# Supplementary material
Source: publisher site journal article supplement (https://www.dovepress.com/get_supplementary_file.php?f=475744.docx)
Supplement: Supplementary file 1 [file get_supplementary_file.php]

**Supplementary Table S1:** Clinical case profile template of patients who were diagnosed with Fabry disease, but remained untreated

| Parameters | Response | | | | |  |  |  |
| --- | --- | --- | --- | --- | --- | --- | --- | --- |
| Age at disease presentation (months/days/years) | 22 years | 12 years | 13 years | Asymptomatic | Asymptomatic | 32 years | 20 years | 19 years |
| Age at diagnosis (months/days/years) | 25 years | 21 years | 6 years (based on positive family history) | 17 years | 23 years | 33 years | 20 years | 19 years |
| Sex | Female | Male | Male | Female | Female | Male | Female | Female |
| Ethnicity | Arab | Middle East | Middle East | Arab | Middle East | Asian | Asian | Asian |
| Presenting feature | Headache | Neuropathic pain in the extremities | Tingling sensation in the extremities | Asymptomatic | No symptoms | Family Screening | Family Screening | Family Screening |
| History of presenting illness | As above | None | None | None | None | No symptoms The previous history of joint pain at 14 years of age, resolved | No symptoms The previous history of joint pain at 14 years of age, resolved | Asymptomatic |
| Creatinine (mg/dL) | 46 | 48 | 55 (normal) | N/A | 59 | 63 |  | 31 |
| Proteinuria (g/day) | Not measured | 0.16 g/L | None done (positive for microalbuminuria) | N/A | N/A | 294 | Declined | negative |
| NT-ProBNP (pg/mL) | Not measured | 4 | None | N/A | N/A | Not available | Not available | Not available |
| Anti-nuclear antibody titer (IU/mL) | Not measured | None | None | N/A | N/A | Not done | Declined | Negative |
| Hemoglobin (g/dL) | 12.5 | 14.7 | 13.5 | N/A | N/A | 12.4, sickle cell trait | Declined | 8.5 , having also sickle cell disease |
| α-GLA (nmol/h/mg) | 3.2 | 7.2 | None | N/A | N/A | 0.2 | N/A | 1.1 |
| Urine analysis | Test not done | Positive for proteinuria | Positive for microalbuminuria (A/C ration: 7.5) | N/A | N/A | Normal | Declined | Normal |
| Preferred ancillary tests and diagnostic methods to confirm the diagnosis | | | | | | | | |
| a. Electrocardiogram and 24-hour Holter monitoring | Results pending | Normal sinus rhythm | Normal sinus rhythm | N/A | N/A | Normal | Declined | Normal . 24-hour Holter normal except for rare PVCs |
| b. Chest X-ray | Normal | Normal X-ray | Normal | N/A | N/A | Normal | Declined | Normal |
| c. Ophthalmological screening | Pending | Normal cornea, lens, fundi, and anterior chambers but has unilateral dilated veins |  | N/A | N/A | Mild Cornea verticillata | Declined | Dryness of the cornea |
| d. Echocardiogram | Pending | Normal | Normal | N/A | N/A | Moderate valve regurgitation | Declined | Normal |
| e. Cardiac MRI |  | None | Normal | N/A | N/A | Claustrophobic, the patient could not tolerate MRI machine | Declined | Not done |
| f. Kidney biopsy | None | None | None | N/A | N/A | Biopsy not done  US : normal | Declined | Biopsy not done  US: normal kidneys with hepatosplenomegaly due to sickle cell disease |
| g. Brain MRI | Results pending | Normal brain MRI | Normal | N/A | N/A | Claustrophobic, the patient could not tolerate MRI machine | Declined | normal |
| h. Audiologic Evaluation | Normal | None | None | N/A | N/A | normal | Declined | No symptoms , not done |
| Biochemical analysis |  |  |  |  |  |  |  |  |
| a. Plasma *GLA* activity (normal range 20–80 nmol/h/mg protein) | 3.2 | 0.0072 | None | N/A | N/A | 0.2 | 1.8 | 1.1 |
| b. Lyso-Gb3 levels (normal range <2 nmol/L) | 3 | 26 | 131 | N/A | 12.1 | 115 | 6.6 | 3.9- 7.7 |
| c. Cardiac troponin levels (troponin I or T) (ng/L) | Not measured | None | None | N/A | N/A | Not measured | Declined | 0.01 |
| Genetic analysis |  |  |  |  |  |  |  |  |
| a. Type of mutation (mutation name) | The familial variant c.1055C>G p. (Ala352Gly) was detected in heterozygosity in the GLA gene | Mutation in the *GLA* gene | Mutation in the *GLA* gene | Mutation in the *GLA* gene | Mutation in the *GLA* gene | Missense c.334C>T, p.112Arg>Cyst | Missense c.334C>T, p.112Arg>Cyst | Missense c.334C>T, p.112Arg>Cyst |
| b. Mutation status of diagnosed cases | Pathogenic | Hemizygous | Hemizygous | Hemizygous | Heterozygous | Pathogenic missense mutation | Pathogenic missense mutation | Pathogenic missense mutation |
| c. Location of mutation in the exon region | t c.1055C>G | c.782G>T, p.G261V | c.782G>T, p.G261V | c.782G>T, p.G261V | c.782G>T, p.G261V | Exon 2 | Exon 2 | Exon 2 |
| d. Frequency of mutations | No details | Only one mutation | Only one mutation | Only one mutation | Only one mutation | No details | No details | No details |
| Please specify the additional tests or assessments that were performed to rule out specific conditions or diseases and to reach a confirmed diagnosis. | None; targeted gene analysis of the familial variant | Plasma *GLA* activity and Lyso-Gb3 levels | Lyso-Gb3 levels | None | Lyso-Gb3 levels (normal range <2 nmol/L) | Enzyme assay and Gb3 | Enzyme assay and Gb3 | Enzyme assay and Gb3 |
| Drug history of the patients |  |  |  |  |  |  |  |  |
| Patient with FD, confirmed by DNA testing, but never been treated with ERT (Yes/no) | Yes | No | No | Yes | Yes | Yes | Yes | Yes |
| Other treatments prescribed for the patients with FD and not receiving ERT, please specify | Following up, no treatment | Receiving the ERT plus: 1) Pregabalin 300 mg every 12 hours. 2) Clonazepam 2 mg every 12 hours. 3) TramadolTM 100 mg every 12 hours. 4) Percocet® (oxycodone) 2 tablets every 8 hours as needed | Receiving ERT and no other medications | None | None | Ophthalmic drops for ophthalmic dryness and follow-up with specialists. | None | Ophthalmic drops for ophthalmic dryness and folic acid for sickle cell anemia. The patient is being followed up by an ophthalmologist, a cardiologist, a nephrologist, a hematologist, and a neurologist. |
| Case report provided by | Dr. Talal Alanzi | Dr. Majid Alfadhel | | | | Dr. Rawda Sunbul | | |

**Abbreviations:**α-GLA: alfa-galactosidase A; DNA: Deoxyribonucleic acid; Gb3: Globotriaosylceramide; *GLA*: *Galactosidase A gene*; ERT: Enzyme replacement therapy; FD: Fabry disease; Lyso-Gb3: Plasma globotriaosylsphingosine; N/A: Not applicable; NT-ProBNP: N-terminal pro-brain natriuretic peptide; PVC: Premature ventricular contraction; SMA: Spinal muscular atrophy; WES: Whole exome sequencing.

**Supplementary Table S2:** Monitoring the response to enzyme replacement therapy

|  | Every 3 months | Every 12 months |
| --- | --- | --- |
| General |  |  |
| Medical history  Physical examination  General appearance | X |  |
| Pain score | X |  |
| Quality of Life score  (SF-36 or EQ5D) | X |  |
| Mainz Severity Score Index | X |  |
| Lab Test |  |  |
| CBC, diff  Electrolytes  Liver enzymes  CPK level  Bone profile and  vitamin D levels  Fasting lipid profile | X |  |
| IgG and IgE antibody testing |  | X |
| Plasma Gb3 |  | X |
| Urine Test |  |  |
| Urine analysis | X |  |
| Albumin/Creatinine ratio | X |  |
| Urine Gb3 |  | X |
| GFR and 24 hour urinary protein |  | X |
| Neurology |  |  |
| MRI of brain |  | X |
| ENT Evaluation |  |  |
| Audiometry and ABR test |  | X |
| Ophthalmology Evaluation |  |  |
| Visual acuity, retinal examination, corneal examination |  | X |
| Cardiology Evaluation |  |  |
| ECG, 24 hour holter monitor,  Echocardiogram |  | X |

Abbreviations: ABR - Auditory brainstem response; CBC - Complete blood count; CPK - Creatine phosphokinase; ECG - Electrocardiogram; ENT - Ear, nose, and throat; EQ5D - EuroQol-5D; GFR - Glomerular filtration rate; IgE - Immunoglobulin E; IgG - Immunoglobulin G; MRI - Magnetic resonance imaging; SF-36 - Short form-36.
